# Supplementary material for: Sustained efficacy of adjuvant immunotherapy with cytokine-induced killer cells for hepatocellular carcinoma: an extended 5-year follow-up
Source: Springer Nature journal article supplement (doi:10.1007/s00262-018-2247-4), 2018-09-19
Supplement: MOESM1 [file 16136886]

## Supplement

|                                                                                                                                          |       |
|------------------------------------------------------------------------------------------------------------------------------------------|-------|
| Supplementary Figure 1. Kaplan-Meier estimates of recurrence-free survival according to maximal tumor stage.                             | p. 2  |
| Supplementary Figure 2. Kaplan-Meier estimates of recurrence-free survival according to AJCC stage.                                      | p. 3  |
| Supplementary Figure 3. Kaplan-Meier estimates of recurrence-free and overall survivals according to total number of injected CIK cells. | p. 4  |
| Supplementary Figure 4. Kaplan-Meier estimates of recurrence-free survival during off-treatment period.                                  | p. 5  |
| Supplementary Table 1. Baseline demographics and disease characteristics of patients who did not undergo the extended follow-up          | p. 6  |
| Supplementary Table 2. Summary of imaging studies                                                                                        | p. 9  |
| Supplementary Table 3. Summary of efficacy measures (efficacy population).                                                               | p. 10 |
| Supplementary Table 4. Univariate and multivariate analyses of factors associated with recurrence-free survival.                         | p. 12 |
| Supplementary Table 5. Post-recurrence treatment modalities in the immunotherapy group and the control group.                            | p. 15 |
| Supplementary Table 6. Change in serum level of alpha-fetoprotein (efficacy population).                                                 | p. 16 |

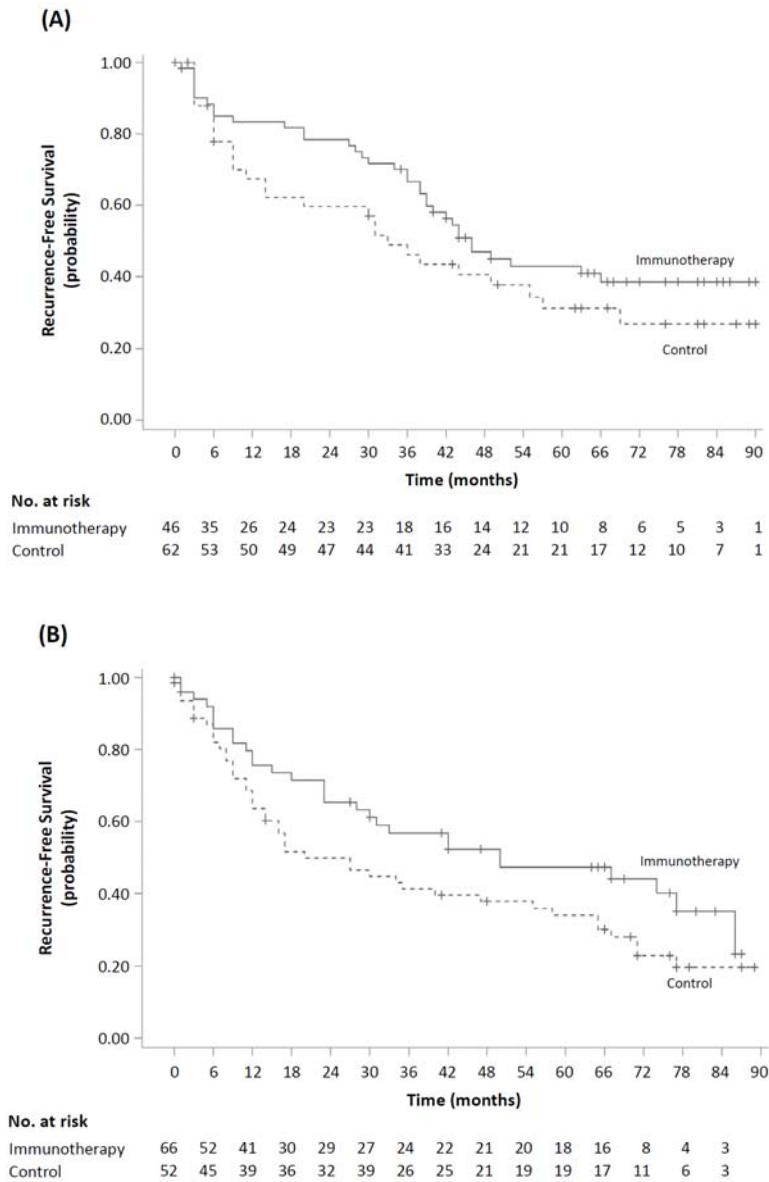

**Supplementary Figure 1.** Kaplan-Meier estimates of recurrence-free survival according to maximal tumor size: (A) maximal size <2 cm (HR, 0.71; 95% CI, 0.43–1.17;  $P=0.09$  by one-sided log-rank test;  $n=108$ ) and (B) maximal size  $\geq 2$  cm (HR, 0.66; 95% CI, 0.41–1.05;  $P=0.035$  by one-sided log-rank test). RFS was computed on all patients included in the efficacy population. Patients who had not progressed or died were censored on data cut-off.

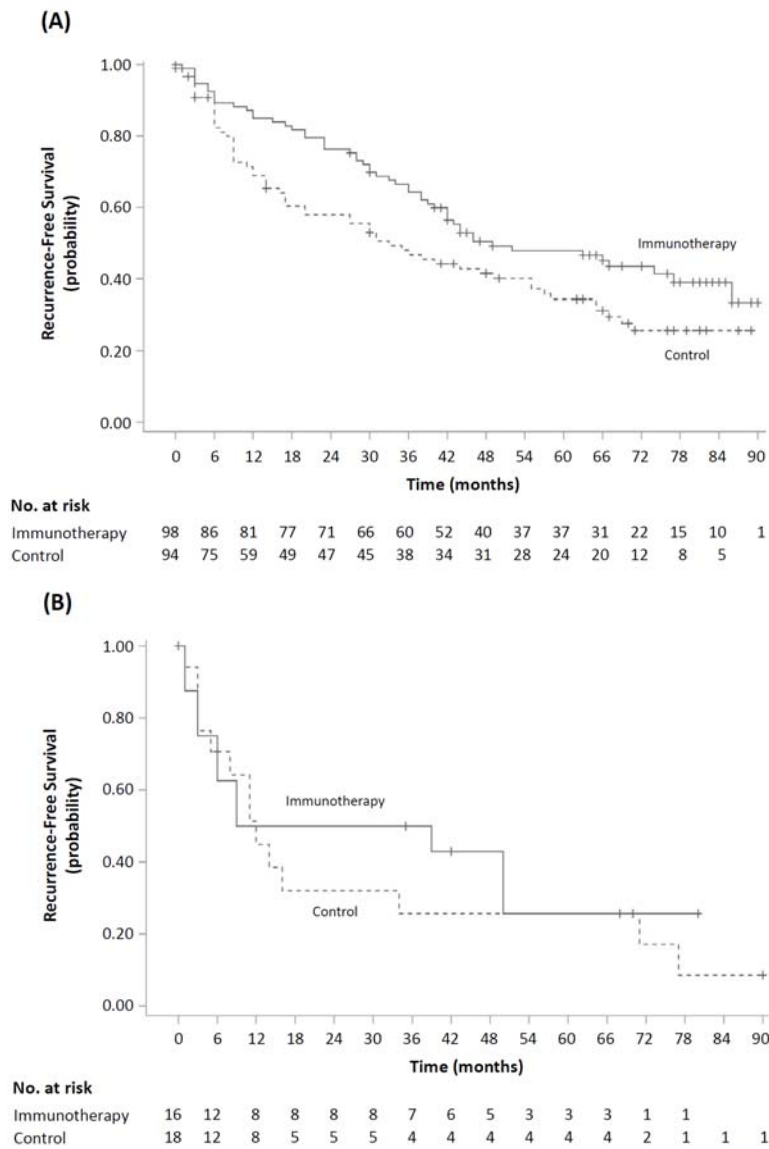

**Supplementary Figure 2.** Kaplan-Meier estimates of recurrence-free survival according to AJCC tumor stage: (A) stage I (HR, 0.66; 95% CI, 0.46–0.96;  $P=0.01$  by one-side log-rank test) and (B) stage II (HR, 0.82; 95% CI, 0.37–1.83;  $P=0.31$  by one-sided log-rank test). RFS was computed on all patients included in the efficacy population. Patients who had not progressed or died were censored on data cut-off.

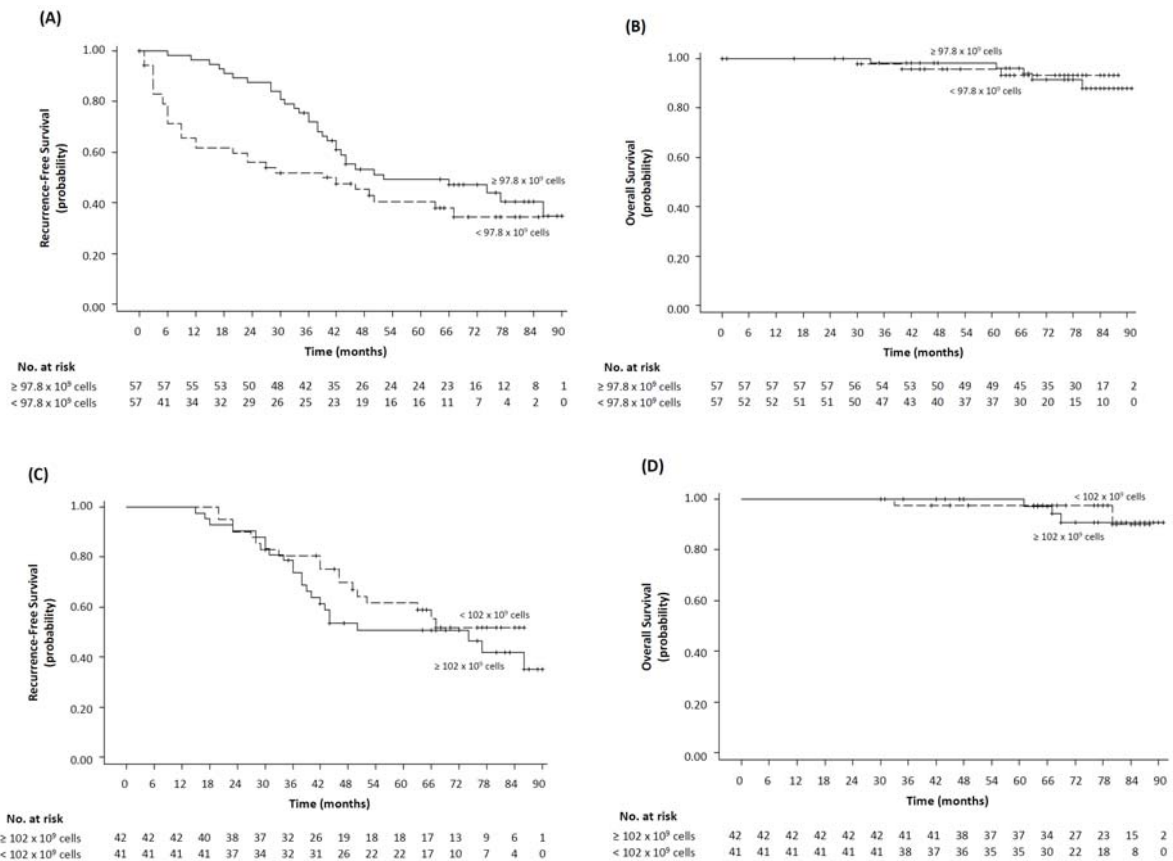

**Supplementary Figure 3.** Kaplan-Meier estimates of recurrence-free survival (A–B) and overall survival (C–D) according to total number of injected CIK cells: (A) among the whole immunotherapy group,  $\geq 97.8 \times 10^9$  cells (median number of total injected CIK cells) vs.  $< 97.8 \times 10^9$  cells (HR, 0.98;  $P=0.87$ ) and (B) in a subgroup of the immunotherapy group who received all scheduled 16 injections,  $\geq 102 \times 10^9$  cells (median value of total injected CIK cells) vs. those who received  $< 102 \times 10^9$  cells (HR, 0.75;  $P=0.37$ ). (C) among the whole immunotherapy group,  $\geq 97.8 \times 10^9$  cells (median number of total injected CIK cells) vs.  $< 97.8 \times 10^9$  cells (HR, 0.94;  $P=0.84$ ) and (D) in a subgroup of the immunotherapy group who received all scheduled 16 injections,  $\geq 102 \times 10^9$  cells (median value of total injected CIK cells) vs. those who received  $< 102 \times 10^9$  cells (HR, 0.80;  $P=0.81$ ).

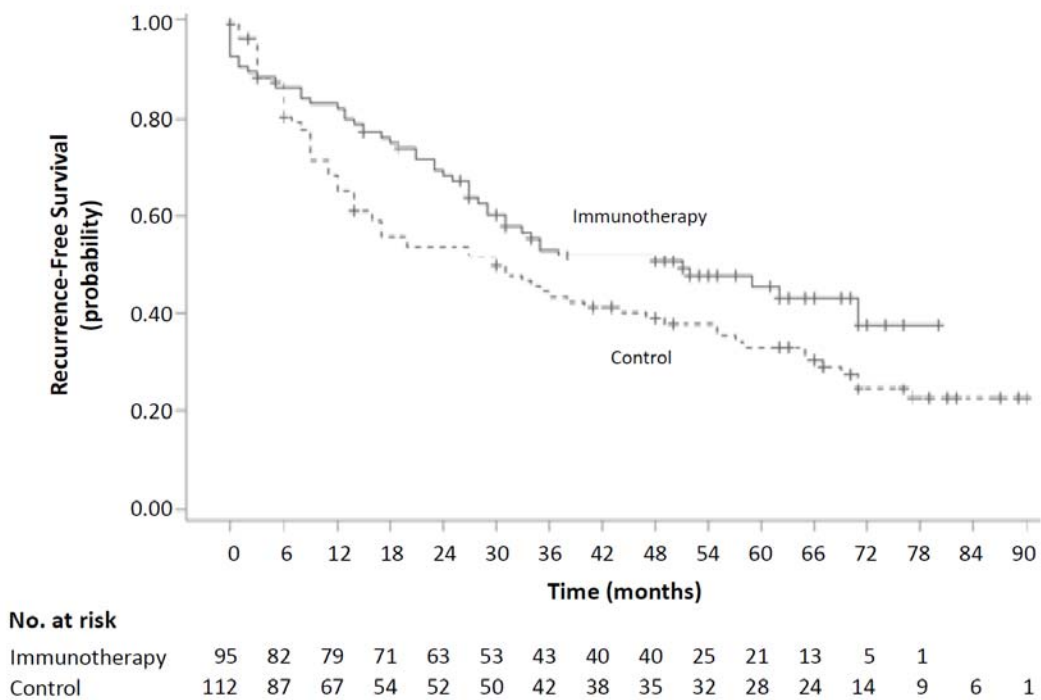

**Supplementary Figure 4.** Kaplan-Meier estimates of recurrence-free survival during off-treatment period: the immunotherapy group had lower risk of tumor recurrence (0.71; 95% CI, 0.49–1.01;  $P=0.03$  by one-sided log-rank test). RFS was computed on all patients included in the efficacy population. Index dates were defined as the last date of CIK cell injection in the immunotherapy group and the date of randomization in the control group, respectively. Patients who had not progressed or died were censored on data cut-off.

**Supplementary Table 1. Baseline demographics and disease characteristics of patients who did not undergo the extended follow-up**

| Variable                                    | Immunotherapy<br>(n=25) | Control group<br>(n=39) | <i>P</i> value    |
|---------------------------------------------|-------------------------|-------------------------|-------------------|
| Male sex, N (%)                             | 18 (72.0)               | 29 (74.4)               | 0.83 <sup>e</sup> |
| Age years, Mean (SE)                        | 55.1 (6.9)              | 57.6 (11.2)             | 0.32 <sup>f</sup> |
| Treatment modality, N (%)                   |                         |                         | 0.64 <sup>g</sup> |
| PEI                                         | 2 (8.0)                 | 1 (2.6)                 |                   |
| RFA                                         | 18 (72.0)               | 23 (59.0)               |                   |
| Surgical resection                          | 5 (20.0)                | 15 <sup>d</sup> (38.4)  |                   |
| HCC stage, N (%) <sup>a</sup>               |                         |                         | 0.74 <sup>e</sup> |
| Stage I                                     | 19 (76.0)               | 31 (79.5)               |                   |
| Stage II                                    | 6 (24.0)                | 8 (20.5)                |                   |
| Number of HCC, N (%)                        |                         |                         | 0.42 <sup>e</sup> |
| < 3                                         | 25 (100.0)              | 38 (97.4)               |                   |
| ≥ 3                                         | 0 (0.0)                 | 1 (2.6)                 |                   |
| Size of HCC, cm                             |                         |                         | 0.79 <sup>h</sup> |
| Median (IQR)                                | 2.1 (1.7–2.8)           | 2.0 (1.7–4.0)           |                   |
| ECOG performance status, N (%) <sup>b</sup> |                         |                         | 0.58 <sup>e</sup> |
| 0                                           | 17 (68.0)               | 29 (74.4)               |                   |
| 1                                           | 8 (32.0)                | 10 (25.6)               |                   |

|                                  |                   |                   |                   |
|----------------------------------|-------------------|-------------------|-------------------|
| Cause of liver disease, N (%)    |                   |                   | 0.84 <sup>g</sup> |
| HBV infection only               | 21 (84.0)         | 28 (71.8)         |                   |
| HCV infection only               | 2 (8.0)           | 6 (15.4)          |                   |
| HBV+HCV co-infection             | 0 (0.0)           | 1 (2.6)           |                   |
| Others                           | 2 (8.0)           | 4 (10.2)          |                   |
| Cirrhosis, N (%) <sup>c</sup>    | 18 (77.8)         | 27 (58.3)         | 0.81 <sup>e</sup> |
| Biochemical analysis             |                   |                   |                   |
| Alpha-fetoprotein, ng/mL         |                   |                   | 0.69 <sup>h</sup> |
| Median (IQR)                     | 4.2 (2.9–14.5)    | 6.0 (2.9–11.5)    |                   |
| PIVKA-II, mAU/mL                 |                   |                   | 0.48 <sup>h</sup> |
| Median (IQR)                     | 20.0 (14.0–24.0)  | 17.0 (14.0–22.0)  |                   |
| Aspartate aminotransferase, IU/L |                   |                   | 0.69 <sup>h</sup> |
| Median (IQR)                     | 35.0 (26.0–42.0)  | 36.0 (28.0–49.0)  |                   |
| Alanine aminotransferase, IU/L   |                   |                   | 0.48 <sup>h</sup> |
| Median (IQR)                     | 28.0 (25.0–40.0)  | 33.0 (21.0–49.0)  |                   |
| Alkaline Phosphatase, IU/L       |                   |                   | 0.30 <sup>h</sup> |
| Median (IQR)                     | 87.0 (77.0–132.0) | 88.0 (68.0–101.0) |                   |
| Albumin, g/dL                    |                   |                   | 1.00 <sup>h</sup> |
| Median (IQR)                     | 4.0 (3.8–4.2)     | 4.0 (3.9–4.2)     |                   |
| Total bilirubin, mg/dL           |                   |                   | 0.79 <sup>h</sup> |
| Median (IQR)                     | 0.8 (0.7–1.2)     | 0.8 (0.6–1.1)     |                   |

|                                             |                  |                  |                   |
|---------------------------------------------|------------------|------------------|-------------------|
| Prothrombin time, sec                       |                  |                  | 0.80 <sup>h</sup> |
| Median (IQR)                                | 13.6 (12.9–14.5) | 13.9 (13.2–14.4) |                   |
| Creatinine, mg/dL                           |                  |                  | 0.89 <sup>h</sup> |
| Median (IQR)                                | 0.9 (0.8–0.9)    | 0.9 (0.7–1.1)    |                   |
| Platelet, ×10 <sup>3</sup> /mm <sup>3</sup> |                  |                  | 0.04 <sup>h</sup> |
| Median (IQR)                                | 117 (78–158)     | 141 (118–167)    |                   |

---

NS, not significant; RFA, radiofrequency ablation; PEI, percutaneous ethanol injection; HCC, hepatocellular carcinoma; IQR, interquartile range; ECOG, Eastern Cooperative Oncology Group; HBV, hepatitis B virus; HCV, hepatitis C virus; PIVKA-II, protein induced by vitamin K absence-II.

Note. Data are expressed as n (%), mean (SE), or median (interquartile range [Q1–Q3]).

<sup>a</sup> The HCC staging was done according to AJCC staging system (6th edition).<sup>46</sup>

<sup>b</sup> The ECOG performance status assesses the daily living abilities of the patient, on a scale ranging from 0 (fully active) to 5 (dead).

<sup>c</sup> Liver cirrhosis was diagnosed by the presence of histological and radiological evidence.

<sup>d</sup> two of them underwent intrahepatic RFA in addition to surgical resection

<sup>e</sup> by chi-square test

<sup>f</sup> by two sample t-test

<sup>g</sup> Fisher's exact test

<sup>h</sup> by Wilcoxon rank sum test



**Supplementary Table 2. Summary of imaging studies**

|                                                               | Immunotherapy<br>(n = 114) | Control group<br>(n = 112) | P value            |
|---------------------------------------------------------------|----------------------------|----------------------------|--------------------|
| Interval between each imaging study, days (per participants)  |                            |                            |                    |
| Before 96 weeks, median (range)                               | 84 (20–168)                | 83 (6–105)                 | 0.74 <sup>a</sup>  |
| After 96 weeks, median (range)                                | 119 (7–898)                | 119 (8–765)                | 0.82 <sup>a</sup>  |
| Number of overall imaging studies, N (per participants)       |                            |                            | 0.007 <sup>b</sup> |
| Mean ± SD                                                     | 12.9 ± 7.1                 | 10.3 ± 7.3                 |                    |
| Number of each imaging modality, N (%) (overall participants) |                            |                            | 0.11 <sup>c</sup>  |
| CT                                                            | 1,391 (94.6%)              | 1,105 (95.9%)              |                    |
| MRI                                                           | 80 (5.4%)                  | 47 (4.1%)                  |                    |

SD, standard deviation; CT, computed tomography; MRI, magnetic resonance imaging.

<sup>a</sup> by Wilcoxon rank-sum test

<sup>b</sup> by two sample t-test

<sup>c</sup> by chi-square test

**Supplementary Table 3. Summary of efficacy measures (efficacy population).**

| Outcome                              | Immunotherapy<br>(n = 114) | Control<br>(n = 112) | Hazard Ratio<br>(95% CI) | P value            |
|--------------------------------------|----------------------------|----------------------|--------------------------|--------------------|
| <b>Recurrence-free survival rate</b> |                            |                      |                          |                    |
| 24 months                            | 72.5%                      | 53.8%                |                          | 0.002 <sup>a</sup> |
| 36 months                            | 62.2%                      | 43.3%                |                          | 0.003 <sup>a</sup> |
| 48 months                            | 49.2%                      | 39.0%                |                          | 0.07 <sup>a</sup>  |
| 60 months                            | 44.8%                      | 33.1%                |                          | 0.046 <sup>a</sup> |
| 72 months                            | 41.0%                      | 24.4%                |                          | 0.008 <sup>a</sup> |
| 84 months                            | 37.0%                      | 22.4%                |                          | 0.02 <sup>a</sup>  |
| Recurrence-free survival (mo)        |                            |                      | 0.67 (0.48–0.94)         | 0.010 <sup>b</sup> |
| Median                               | 46.0                       | 30.0                 |                          |                    |
| <b>Overall survival rate</b>         |                            |                      |                          |                    |
| 24 months                            | 100.0%                     | 91.9%                |                          |                    |
| 36 months                            | 98.1%                      | 88.7%                |                          |                    |
| 48 months                            | 97.1%                      | 86.5%                |                          |                    |
| 60 months                            | 97.1%                      | 85.3%                |                          |                    |
| 72 months                            | 91.9%                      | 79.9%                |                          |                    |
| 84 months                            | 89.7%                      | 76.1%                |                          |                    |
| Overall survival (mo)                |                            |                      | 0.33 (0.15–0.76)         | 0.006 <sup>b</sup> |
| Median                               | NA                         | NA                   |                          |                    |

Cancer-specific survival rate

|                               |        |       |                  |                    |
|-------------------------------|--------|-------|------------------|--------------------|
| 24 months                     | 100.0% | 94.9% |                  |                    |
| 36 months                     | 99.1%  | 91.6% |                  |                    |
| 48 months                     | 98.1%  | 90.5% |                  |                    |
| 60 months                     | 98.1%  | 89.2% |                  |                    |
| 72 months                     | 94.5%  | 84.9% |                  |                    |
| 84 months                     | 92.1%  | 80.9% |                  |                    |
| Cancer-specific survival (mo) |        |       | 0.33 (0.13–0.86) | 0.017 <sup>b</sup> |
| Median                        | NA     | NA    |                  |                    |

---

NOTE. Data are expressed as %, hazard ratio with 95% CI, or median.

Abbreviation: CI, confidence interval; NA, not applicable.

<sup>a</sup> by one-sided z-test

<sup>b</sup> by one-sided log-rank test

**Supplementary Table 4. Univariate and multivariate analyses of factors associated with recurrence-free survival.**

| Variables                                       | Univariate analysis |                | Multivariate analysis |                |
|-------------------------------------------------|---------------------|----------------|-----------------------|----------------|
|                                                 | HR (95% CI)         | <i>P</i> value | HR (95% CI)           | <i>P</i> value |
| Age ( $\geq 60$ vs. $< 60$ years)               | 1.50 (1.07–2.12)    | 0.02           | 1.43 (1.01–2.03)      | 0.046          |
| Sex (male vs. female)                           | 1.32 (0.81–2.14)    | 0.26           |                       |                |
| Etiology of liver disease (HBV or HCV vs. NBNC) | 0.98 (0.57–1.71)    | 0.95           |                       |                |
| Liver cirrhosis (yes vs. no)                    | 1.20 (0.84–1.71)    | 0.32           |                       |                |
| AFP ( $\geq 20$ vs. $< 20$ ng/mL)               | 1.84 (1.17–2.89)    | 0.008          | 2.25 (1.41–3.60)      | 0.0007         |
| Performance status (ECOG 0 vs. 1)               | 1.16 (0.80-1.68)    | 0.43           |                       |                |

|                                                             |                  |      |                  |       |
|-------------------------------------------------------------|------------------|------|------------------|-------|
| Histological confirmation (yes vs. no)                      | 0.79 (0.56–1.13) | 0.20 |                  |       |
| HCC maximal diameter ( $\geq 2$ vs. $< 2$ cm)               | 1.17 (0.84–1.65) | 0.35 |                  |       |
| Treatment modality (RFA or PEI vs. surgery)                 | 1.59 (1.08–2.35) | 0.02 | 1.84 (1.22–2.77) | 0.003 |
| Platelet ( $\geq 140$ vs. $< 140 \times 10^3/\text{mm}^3$ ) | 0.97 (0.69–1.37) | 0.88 |                  |       |
| AST ( $\geq 40$ vs. $< 40$ IU/L)                            | 1.24 (0.88–1.75) | 0.23 |                  |       |
| ALT ( $\geq 40$ vs. $< 40$ IU/L)                            | 0.93 (0.65–1.33) | 0.69 |                  |       |
| ALP ( $\geq 115$ vs. $< 115$ IU/L)                          | 1.10 (0.69–1.76) | 0.68 |                  |       |
| PIVKA-II ( $\geq 40$ vs. $< 40$ AU/mL)                      | 1.14 (0.56–2.34) | 0.71 |                  |       |
| Albumin ( $\geq 3.5$ vs. $< 3.5$ g/dL)                      | 0.94 (0.46–1.93) | 0.87 |                  |       |
| Bilirubin ( $\geq 1.2$ vs. $< 1.2$ mg/dL)                   | 1.12 (0.71–1.77) | 0.63 |                  |       |

|                                                   |                  |                   |                  |                    |
|---------------------------------------------------|------------------|-------------------|------------------|--------------------|
| Prothrombin time ( $\geq 13$ vs. $< 13$ sec)      | 1.05 (0.67–1.64) | 0.84              |                  |                    |
| Creatinine ( $\geq 1.2$ vs. $< 1.2$ mg/dL)        | 1.39 (0.73–2.65) | 0.31              |                  |                    |
| Treatment group (immunotherapy vs. control group) | 0.67 (0.48–0.94) | 0.01 <sup>a</sup> | 0.69 (0.49–0.97) | 0.016 <sup>a</sup> |

---

Abbreviation: HR, hazard ratio; CI, confidence interval; HBV, hepatitis B virus; HCV, hepatitis C virus; NBNC, non-HBV and non-HCV; AFP, alpha-fetoprotein; ECOG, Eastern Cooperative Oncology Group; HCC, hepatocellular carcinoma; RFA, radiofrequency ablation; PEI, Percutaneous ethanol injection; AST, aspartate aminotransferase; ALT, alanine aminotransferase; ALP, alkaline phosphatase; PIVKA-II, protein induced by vitamin K absence-II.

<sup>a</sup> by one-sided test. Otherwise, two-sided test was used.

**Supplementary Table 5. Post-recurrence treatment modalities in the immunotherapy group and the control group.**

|                                 | Immunotherapy<br>(n = 63) | Control<br>(n = 68) |
|---------------------------------|---------------------------|---------------------|
| Transarterial chemoembolization | 182                       | 219                 |
| Radiofrequency ablation         | 52                        | 53                  |
| Percutaneous ethanol injection  | 50                        | 42                  |
| Surgical resection              | 9                         | 15                  |
| Liver transplantation           | 11                        | 4                   |
| Sorafenib                       | 10                        | 7                   |
| Conventional chemotherapy       | 16                        | 9                   |
| Radiation therapy               | 17                        | 21                  |
| Proton therapy                  | 0                         | 1                   |
| <b>Total</b>                    | <b>347</b>                | <b>371</b>          |

**Supplementary Table 6. Change in serum level of alpha-fetoprotein (efficacy population).**

| Variable                    | Immunotherapy<br>(n = 114) | Control<br>(n = 112) | <i>P</i> value <sup>a</sup> |
|-----------------------------|----------------------------|----------------------|-----------------------------|
| Alpha-fetoprotein (ng/mL)   |                            |                      |                             |
| Baseline                    | 11.3 ± 18.6                | 9.2 ± 13.6           |                             |
| End of study                | 16.1 ± 40.5                | 54.0 ± 439.3         |                             |
| Change from baseline        | 5.3 ± 42.0                 | 50.3 ± 463.2         | 0.57                        |
| <i>P</i> value <sup>b</sup> | 0.57                       | 0.75                 |                             |

NOTE: Data are expressed as mean ± SD.

<sup>a</sup> Wilcoxon rank-sum test comparing changes in indicated parameters of two groups from baseline.

<sup>b</sup> Wilcoxon signed-rank test comparing changes in indicated parameters within each group from baseline.
